# Supplementary material for: Investigating the host specificity of Campylobacter jejuni and Campylobacter coli by sequencing gyrase subunit A
Source: PubMed Central journal article supplement (PMC4156964; doi:10.1186/s12866-014-0205-7), 2014-08-28
Supplement: 12866_2014_205_MOESM1_ESM.pdf [file 12866_2014_205_MOESM1_ESM.pdf]

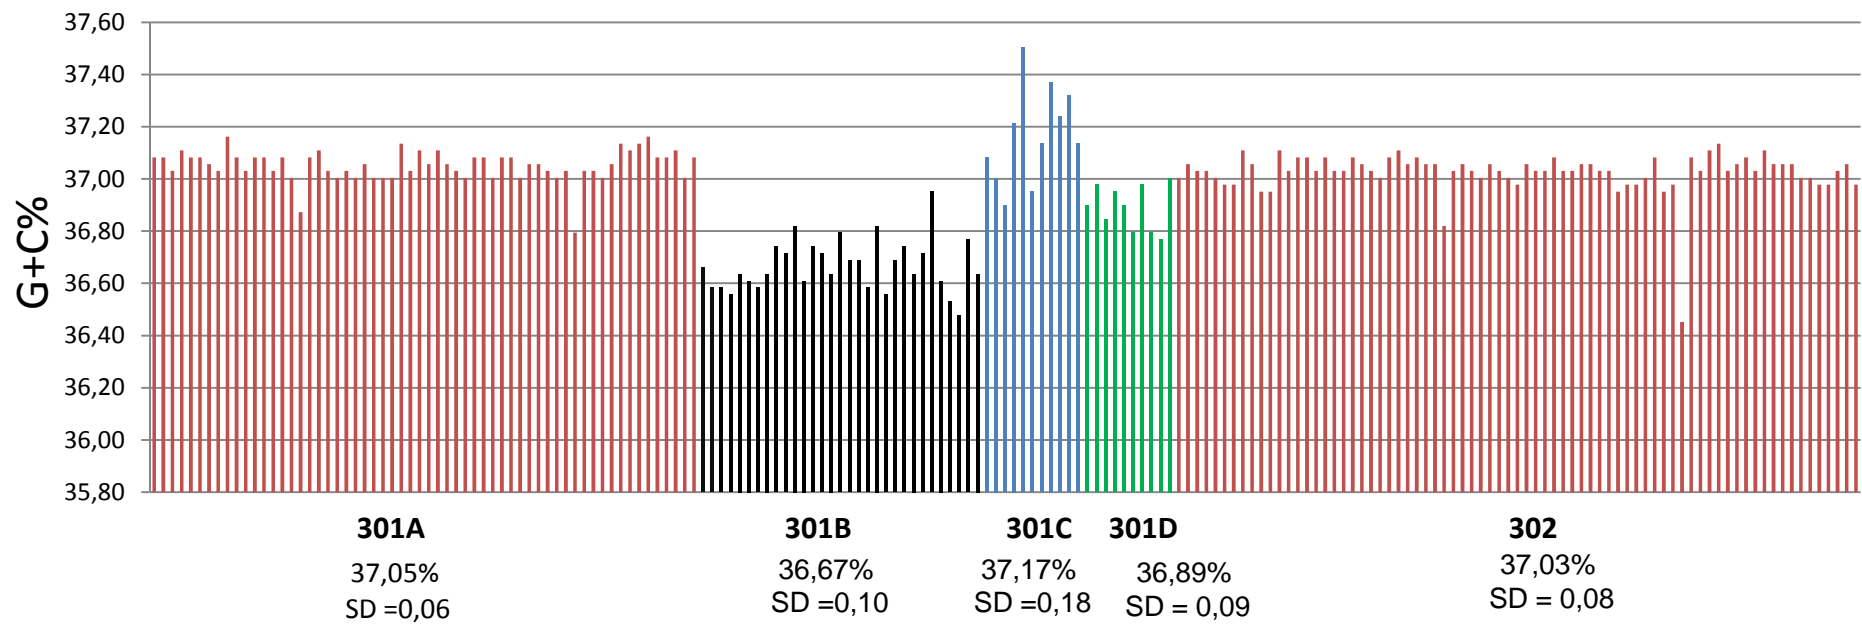

Additional file 1

GC contents using concatenated nucleotide sequence: 7 housekeeping genes from MLST with *gyrA* alleles (3805 bp).

Results from the 187 genotypes are classified according *gyrA* peptide groups. Average in GC% for each group are shown.
