# Supplementary material for: Investigating the host specificity of Campylobacter jejuni and Campylobacter coli by sequencing gyrase subunit A
Source: PubMed Central journal article supplement (PMC4156964; doi:10.1186/s12866-014-0205-7), 2014-08-28
Supplement: 12866_2014_205_MOESM2_ESM.pdf [file 12866_2014_205_MOESM2_ESM.pdf]

Additional file 2  
Neighbour-joining radial distance  
phylogenetic tree constructed with  
concatenated nucleotide  
sequences from STs identified  
from this study and from Colles *et al.* (2011) on wild and  
domesticated ducks.

- Wild ducks (Colles *et al.* 2011)
- ● ● Surface waters (this study)
- Domesticated animals  
and surface waters (this study)

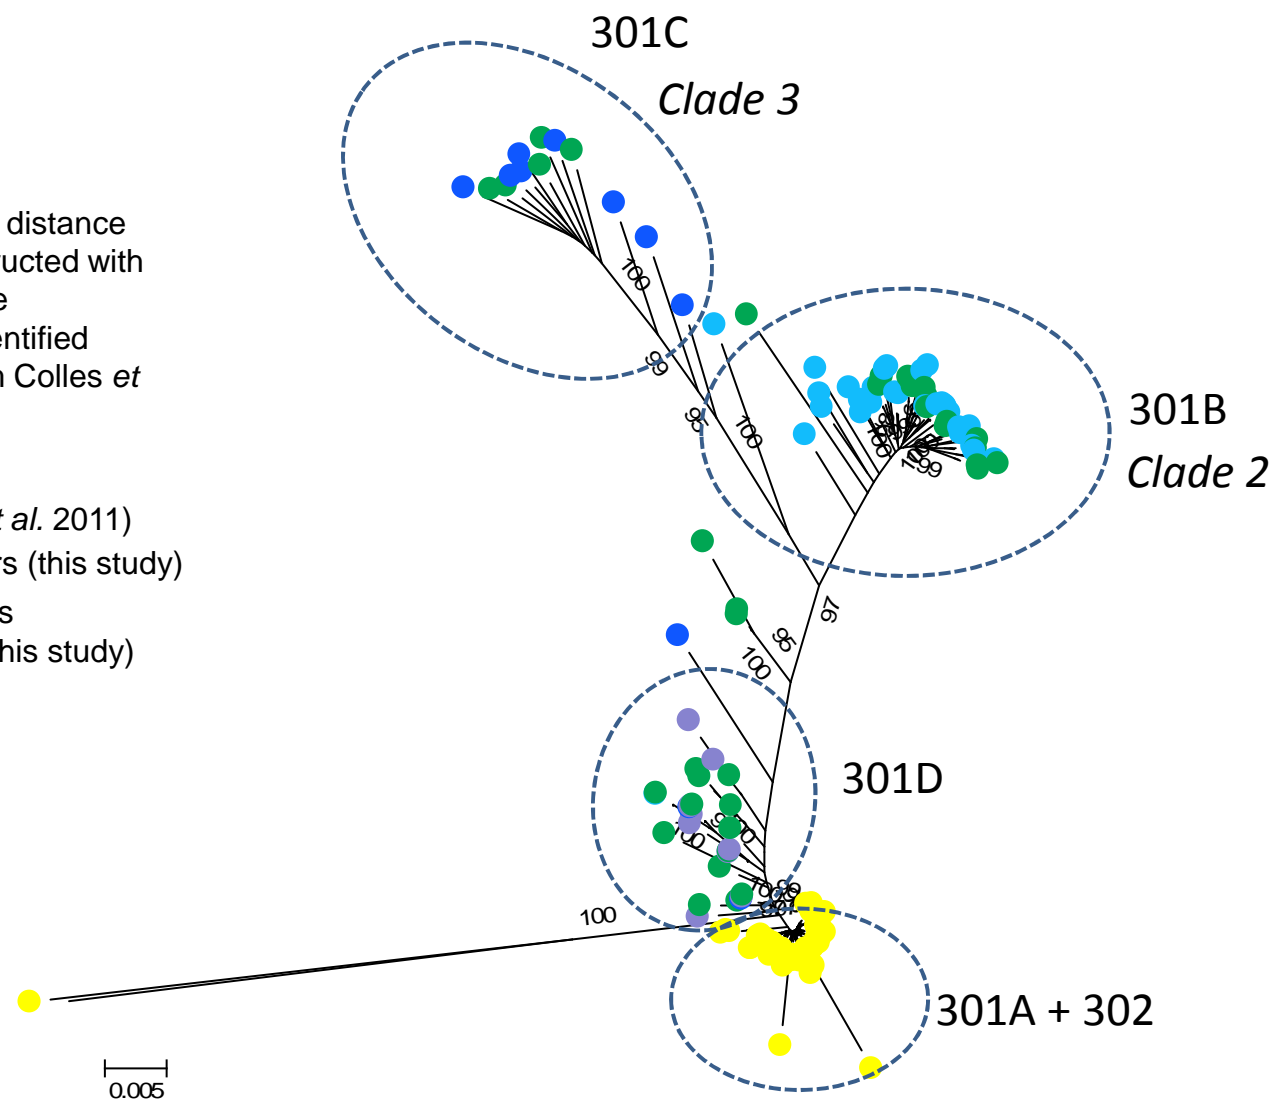

Bootstrap support values (%) for each of the nodes leading to the *gyrA* sequence clusters are indicated.
