# Supplementary material for: Investigating the host specificity of Campylobacter jejuni and Campylobacter coli by sequencing gyrase subunit A
Source: PubMed Central journal article supplement (PMC4156964; doi:10.1186/s12866-014-0205-7), 2014-08-28
Supplement: 12866_2014_205_MOESM3_ESM.pdf [file 12866_2014_205_MOESM3_ESM.pdf]

Additional file 3: MICs recorded for *C. jejuni* isolates with Ser22Gly but without the Thr86Ile substitution. Interpretative thresholds for resistance (R): CIP\_R >0.5 and NAL\_R > 16

| Isolate | Source  | <i>gyrA</i><br>allele no | MIC mg l <sup>-1</sup> |          |
|---------|---------|--------------------------|------------------------|----------|
|         |         |                          | CIP                    | NAL      |
| C111066 | chicken | 6                        | 0.064                  | <0.5*    |
| C100198 | chicken | 10                       | 0.064                  | 2        |
| C100199 | chicken | 10                       | 0.064                  | 1        |
| C110443 | chicken | 10                       | 0.032                  | <0.5*    |
| C120384 | cattle  | 10                       | 0.032                  | <0.0625* |
| C121822 | cattle  | 10                       | 0.064                  | 1        |
| E60476P | cattle  | 10                       | 0.047                  | 3        |
| E60735P | cattle  | 10                       | 0.064                  | 3        |
| E70030  | chicken | 10                       | 0.064                  | 2        |
| E70167  | chicken | 10                       | 0.032                  | 8        |
| C120911 | chicken | 23                       | 0.125                  | <4*      |

CIP, ciprofloxacin; NAL, nalidixic acid

\* MICs values deduced from disk diffusion assay – all other values were obtained by E.test method.
